# Supplementary material
Source: PubMed Central journal article supplement (PMC3365688)

## Supplemental Figures

**Supplemental Figure 1.** Elevation of retinal cGMP levels in *CNGA3<sup>-/-</sup>/Nrl<sup>-/-</sup>* and *CNGB3<sup>-/-</sup>/Nrl<sup>-/-</sup>* mice. ELISA (Assay Designs Inc., Ann Arbor, MI) was performed using light-adapted mouse retina (P30). Compared to the levels in *Nrl<sup>-/-</sup>* mice, *CNGA3<sup>-/-</sup>/Nrl<sup>-/-</sup>* mice exhibited a remarkable elevation in retinal cGMP levels while *CNGB3<sup>-/-</sup>/Nrl<sup>-/-</sup>* mice showed a moderate increase. The cGMP level was about 25-fold higher in *CNGA3<sup>-/-</sup>/Nrl<sup>-/-</sup>* retina than that in *Nrl<sup>-/-</sup>* retina. No such increase was clearly detected in *CNGA3<sup>-/-</sup>* and *CNGB3<sup>-/-</sup>* mice, compared to the wild type (WT). This is likely because of the small proportion of cones in the rod-dominant retina. In addition, cGMP levels in the WT retina were significantly higher than the levels in *Nrl<sup>-/-</sup>* retinas. Retinas of *rd1* mice were included as an assay control. Data are represented as means  $\pm$  SEM of measurements from four independent experiments using retinas from 8-10 mice.

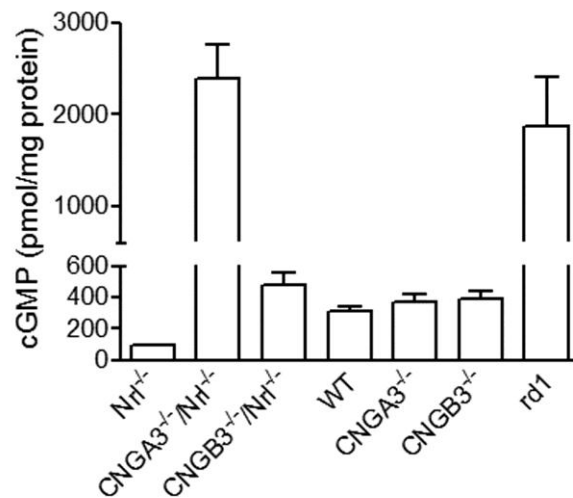

**Supplemental Figure 2.** Expression of CNGA3 in *CNGB3<sup>-/-</sup>/Nrl<sup>-/-</sup>* retinas. Western blot was performed to detect retinal expression of CNGA3 in *CNGB3<sup>-/-</sup>/Nrl<sup>-/-</sup>* and *Nrl<sup>-/-</sup>* mice (P30). Shown are representative images (*left panel*) and the correlating densitometric analysis (*right panel*). Actin was probed as a loading control. Data are represented as means  $\pm$  SEM of measurements from three independent experiments using retinas from 4-5 mice. Unpaired student's *t* test was used for determination of the significance (\*,  $P < 0.05$ ).

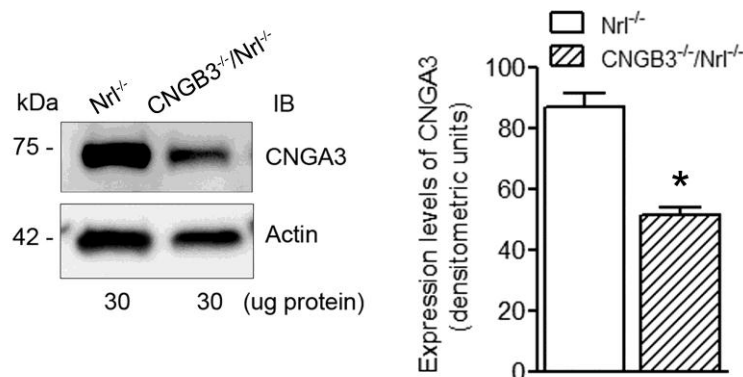

Supplement: supp_M112.342220_jbc.M112.342220-1.pdf [file supp_M112.342220_jbc.M112.342220-1.pdf]
